# Supplementary material for: MicroRNA-146a limits tumorigenic inflammation in colorectal cancer
Source: PubMed Central journal article supplement (PMC8065171; doi:10.1038/s41467-021-22641-y), 2021-04-23
Supplement: 41467_2021_22641_MOESM1_ESM.pdf [file 41467_2021_22641_MOESM1_ESM.pdf]

**Supplementary Information for:**

**MicroRNA-146a Limits Tumorigenic Inflammation in Colorectal Cancer**

Lucien P. Garo<sup>1,2</sup>, Amrendra K. Ajay<sup>3</sup>, Mai Fujiwara<sup>1</sup>, Galina Gabriely<sup>1</sup>, Radhika Raheja<sup>1</sup>, Chantal Kuhn<sup>1</sup>,  
Brendan Kenyon<sup>1</sup>, Nathaniel Skillin<sup>1</sup>, Ryoko Kadowaki-Saga<sup>1</sup>, Shrishti Saxena<sup>1</sup>, and Gopal Murugaiyan<sup>1\*</sup>

<sup>1</sup>Ann Romney Center for Neurologic Diseases, Department of Neurology, Brigham and Women's Hospital and Harvard Medical School, Boston, MA 02115, USA.

<sup>2</sup>Boston University School of Medicine, Boston, MA 02118, USA

<sup>3</sup>Renal Division, Department of Medicine, Brigham and Women's Hospital and Harvard Medical School, Boston, MA 02115, USA.

These authors contributed equally: Amrendra K. Ajay and Mai Fujiwara

\*Corresponding author: [mgopal@rics.bwh.harvard.edu](mailto:mgopal@rics.bwh.harvard.edu)

**Supplementary Fig. 1. WT and miR-146a<sup>-/-</sup> bone marrow chimeras.**

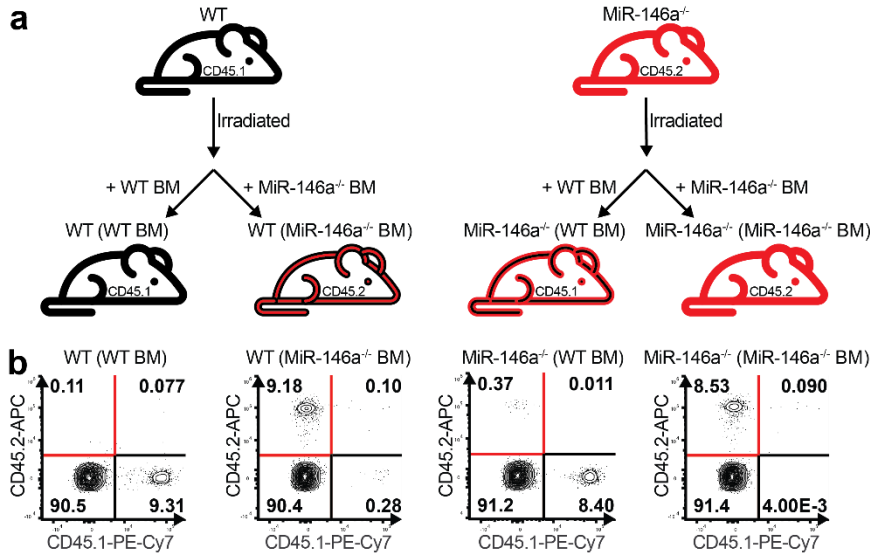

**Supplementary Fig. 1. WT and miR-146a<sup>-/-</sup> bone marrow chimeras.**

**a**, Schematic of WT and miR-146a<sup>-/-</sup> BM chimeras. CD45.1 WT and CD45.2 miR-146a<sup>-/-</sup> mice were irradiated and reconstituted with WT or miR-146a<sup>-/-</sup> 5 x 10<sup>6</sup> bone marrow cells for 6 weeks. Extended license image from stock.adobe.com. **b**, Representative FACS plots of CD45.1 or CD45.2 compartments in these mice after 6 weeks (n = 3). Data representative of ≥2 independent experiments. n = biologically independent replicates per group. Source data are provided as a Source data file.

**Supplementary Fig. 2. MiR-146a deletion within myeloid cells promotes CRC development.**

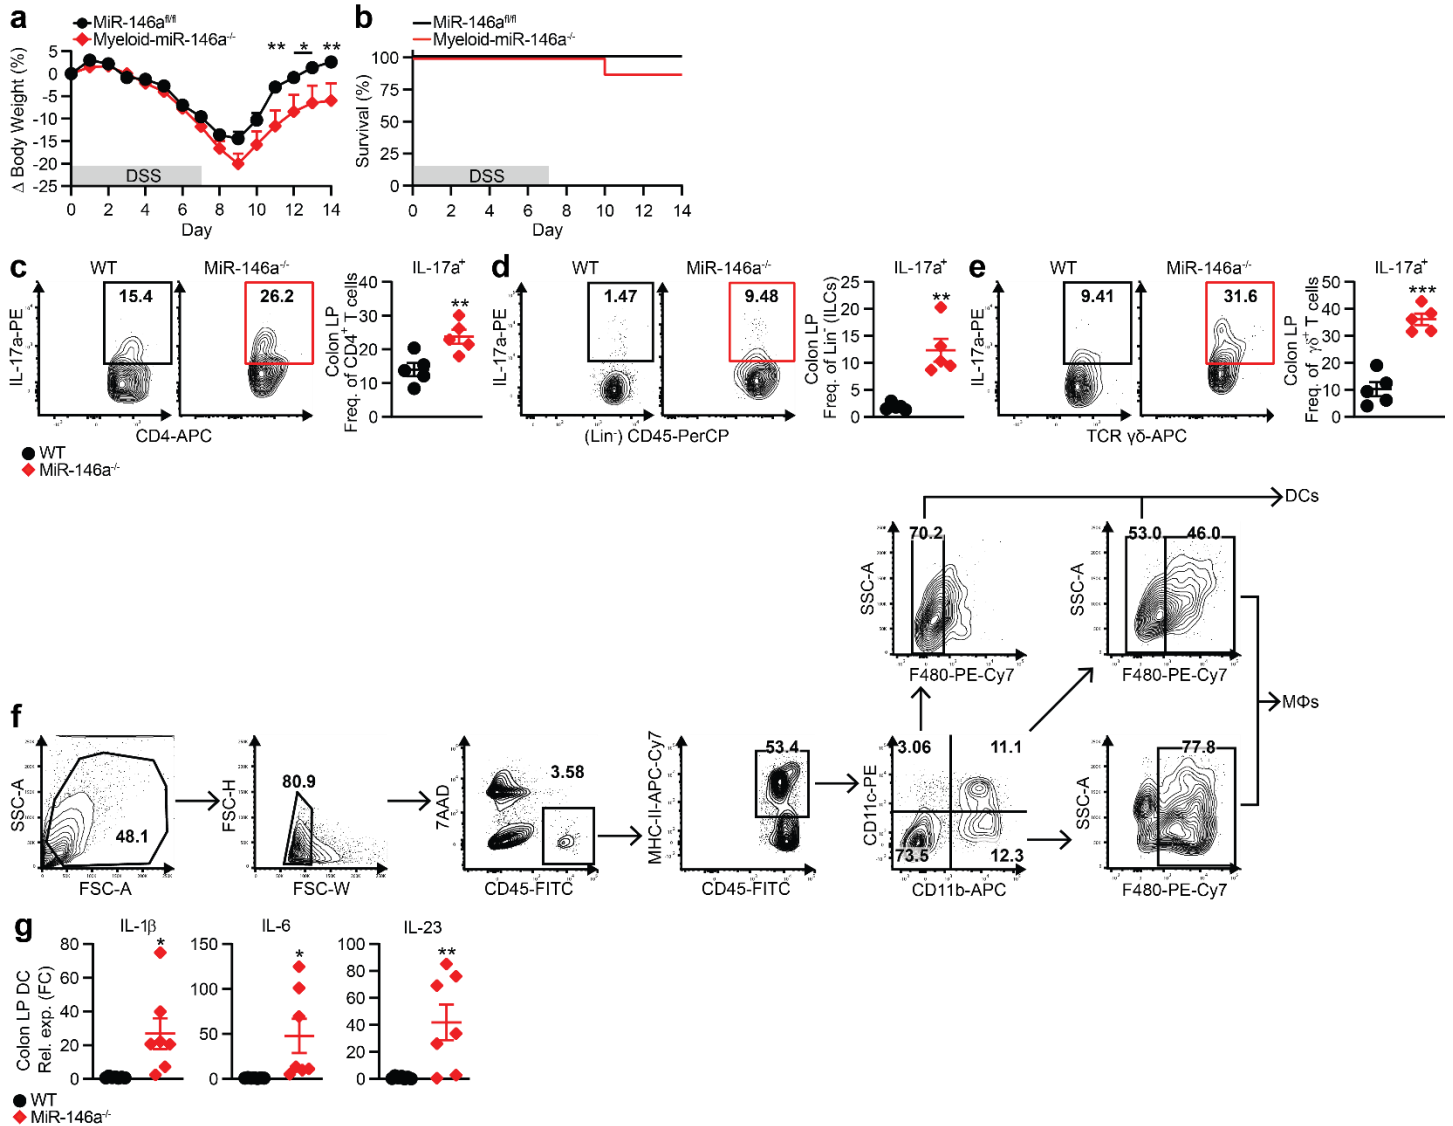

**Supplementary Fig. 2. MiR-146a deletion within myeloid cells promotes CRC development.**

**a,b** Percent body weight changes (**a**) and survival (**b**) in colitic (3% DSS) miR-146a<sup>fl/fl</sup> and myeloid-miR-146a<sup>-/-</sup> mice (n = 8). **c-e**, Representative FACS plots and frequencies of IL-17a in CD4<sup>+</sup> T cells (Th17) (**c**), (Lin<sup>-</sup>CD45<sup>+</sup>) ILCs (**d**), and (CD3<sup>+</sup> $\gamma\delta$ <sup>+</sup>)  $\gamma\delta$ <sup>+</sup> T cells (**e**) from the colonic LP of CRC WT and miR-146a<sup>-/-</sup> mice (n = 5). **f**, Schematic of FACS for LP DCs and MΦs: Total cells → Singlets → Live (7AAD<sup>-</sup>) CD45<sup>+</sup> immune cells → MHC-II<sup>+</sup>CD45<sup>+</sup> immune cells → CD11c<sup>+</sup>CD11b<sup>+</sup>F480<sup>-</sup> DCs and CD11c<sup>+</sup>CD11b<sup>+</sup>F480<sup>+</sup> MΦs. **g**, qPCR of IL-17-inducing cytokines in CD11c<sup>+</sup> DCs from the colonic LP of WT and miR-146a<sup>-/-</sup> mice with AOM/DSS-induced CRC (n = 7). qPCR data as FC from WT. Data representative of  $\geq 2$  independent experiments. n = biologically independent replicates per group. Mean  $\pm$  SEM. \*p<.05, \*\*p<.01, \*\*\*p<.001, by two-way ANOVA with Bonferroni adjustment (**a**) or two-tailed Student's t-test (**c-e,g**). Source data are provided as a Source data file.

**Supplementary Fig 3. Myeloid cell deletion of miR-146a enhances tumorigenic IL-17-promoting cytokines by promoting NOD2-RIPK2 signaling.**

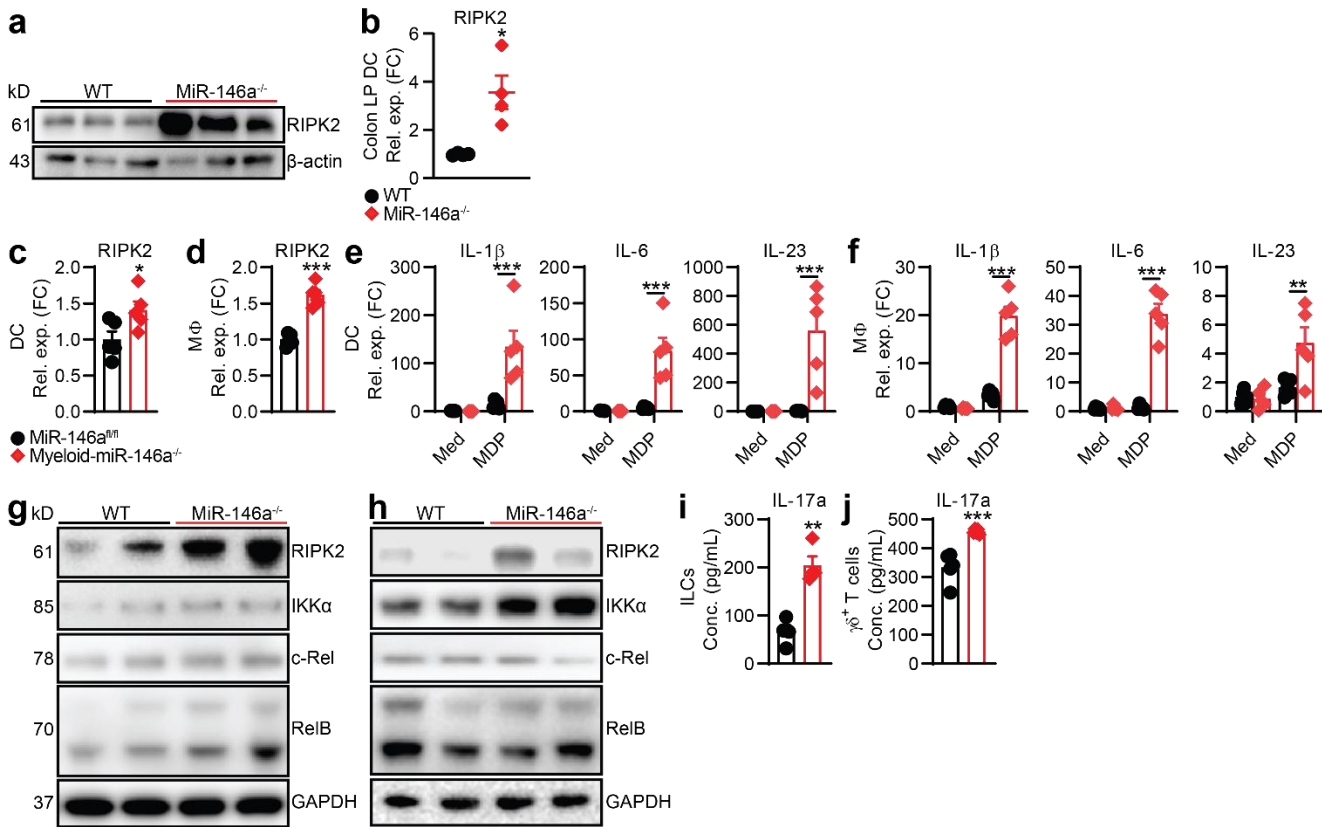

**Supplementary Fig 3. Myeloid cell deletion of miR-146a enhances tumorigenic IL-17-promoting cytokines by promoting NOD2-RIPK2 signaling.**

**a**, Western blot of RIPK2 in CRC tissue from WT and miR-146a<sup>-/-</sup> mice. **b**, qPCR of RIPK2 in CD11c<sup>+</sup> DCs from the colonic LP of WT and miR-146a<sup>-/-</sup> mice with AOM/DSS-induced CRC (n = 4). **c,d**, qPCR of RIPK2 in bone marrow-derived DCs (**c**) and M $\Phi$ s (**d**) from miR-146a<sup>fl/fl</sup> and myeloid-miR-146a<sup>-/-</sup> mice stimulated with MDP (10  $\mu$ g/ml) for 24 h (n = 5). **e,f**, qPCR of IL-17-inducing cytokines in miR-146a<sup>fl/fl</sup> and myeloid-miR-146a<sup>-/-</sup> BMDCs (**e**) and BMDMs (**f**) stimulated with MDP (10  $\mu$ g/ml) for 24h (n = 5). **g,h**, Western blots of RIPK2, IKK $\alpha$ , c-Rel, and RelB from WT and miR-146a<sup>-/-</sup> BMDMs (**g**) and BMDCs (**h**). **i,j**, ELISA of IL-17 in ILCs (n = 5) (**i**) and  $\gamma\delta^+$  T cells (n = 4) (**j**) cocultured with WT or miR-146a<sup>-/-</sup> BMDCs at a 1:1 ILC:DC or  $\gamma\delta^+$  T cell:DC ratio for 5 days under low-dose Th17-polarizing conditions with TGF- $\beta$  (0.5 ng/ml), IL-6 (10 ng/ml), and anti-IFN- $\gamma$  (10  $\mu$ g/ml). Soluble anti-CD3 and anti-CD28 (1  $\mu$ g/ml) was added to  $\gamma\delta^+$  T cell:DC cocultures. DCs were prestimulated with MDP for 20h, then washed before coculture. qPCR data as FC from WT (**b,i,j**), miR-146a<sup>fl/fl</sup> (**c,d**) or miR-146a<sup>fl/fl</sup> med (**e,f**). Data representative of  $\geq 2$  independent experiments. n = biologically independent replicates per group. Mean  $\pm$  SEM. \*p<.05, \*\*p<.01, \*\*\*p<.001, by two-way ANOVA with Tukey adjustment (**e,f**) or two-tailed Student's t-test (**b-d,i,j**). Source data are provided as a Source data file.

**Supplementary Fig. 4. MiR-146a deletion within IECs promotes CRC development.**

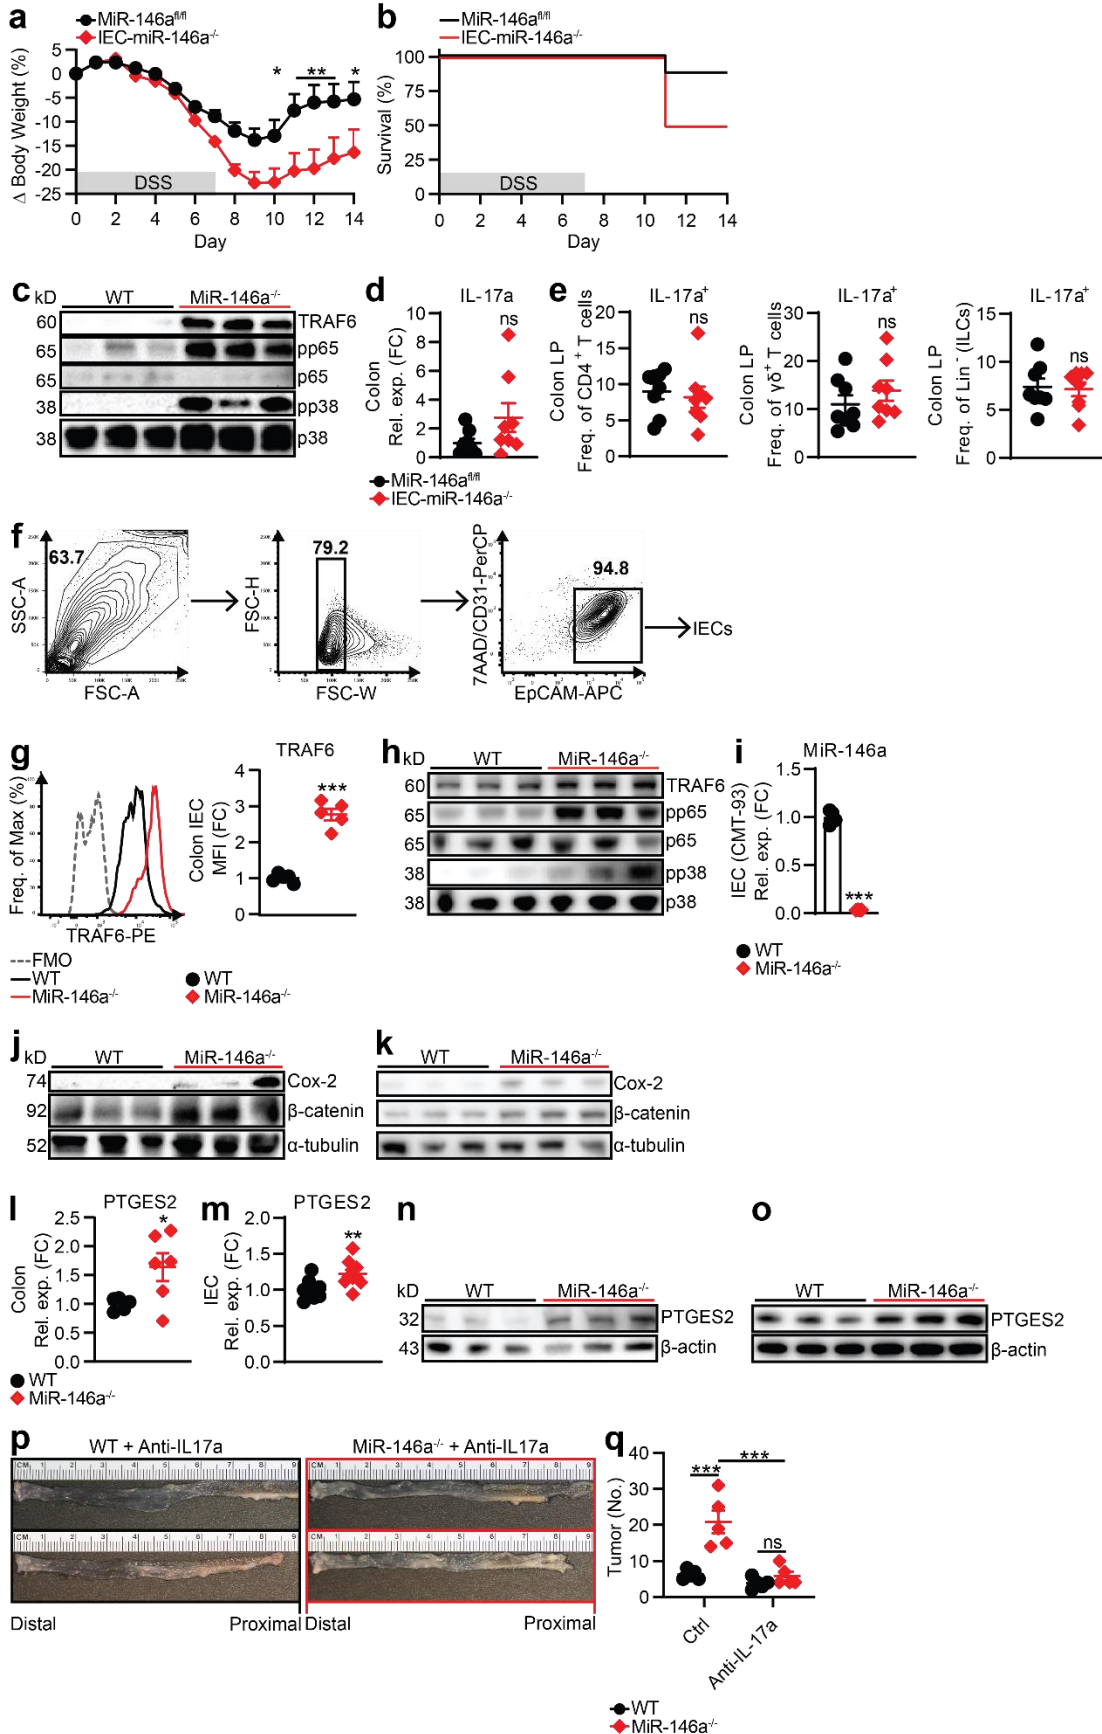

#### Supplementary Fig. 4. MiR-146a deletion within IECs promotes CRC development.

**a,b**, Percent body weight changes (**a**) and survival (**b**) in colitic (3% DSS) miR-146a<sup>fl/fl</sup> and IEC-miR-146a<sup>-/-</sup> mice (n = 8). **c**, Western blots of TRAF6, NF-κB subunit phospho-p65 (pp65), and phospho-p38 (pp38) MAPK in CRC tissue from WT and miR-146a<sup>-/-</sup> mice. **d**, qPCR of IL-17 in CRC tissue from miR-146a<sup>fl/fl</sup> and IEC-miR-146a<sup>-/-</sup> mice with AOM/DSS-induced CRC. qPCR data as FC from miR-146a<sup>fl/fl</sup> (n = 8) **e**, FACS frequencies of IL-17a in CD4<sup>+</sup> T cells (Th17), (Lin<sup>-</sup>CD45<sup>+</sup>) ILCs, and (CD3<sup>+</sup>γδ<sup>+</sup>) γδ<sup>+</sup> T cell from the colonic LP of CRC miR-146a<sup>fl/fl</sup> and IEC-miR-146a<sup>-/-</sup> mice (n = 8). **f**, Schematic of FACS for IECs: Total cells → Singlets → Live (7AAD<sup>-</sup>) CD31<sup>-</sup> EpCAM<sup>+</sup> IECs. **g**, Representative FACS histograms and MFIs of TRAF6 in FACS-sorted IECs from WT and miR-146a<sup>-/-</sup> mice with AOM/DSS-induced CRC. MFI as FC from WT (n = 5). **h**, Western blots of TRAF6, pp65, and pp38 in IECs from CRC WT and miR-146a<sup>-/-</sup> mice. **i**, qPCR of miR-146a in ctrl or miR-146a-silenced CMT-93 IEC line (n = 4). **j,k**, Western blots of Cox-2 and β-catenin in CRC tissue (**j**) and IECs (**k**) from CRC WT and miR-146a<sup>-/-</sup> mice. **l,m**, qPCR of PTGES2 in CRC tissue (n = 5-6) (**l**) and IECs (n = 9-10) (**m**) from CRC WT and miR-146a<sup>-/-</sup> mice. **n,o**, Western blot of PTGES2 in CRC tissue (**n**) and IECs (**o**) from CRC WT and miR-146a<sup>-/-</sup> mice. **p,q**, Representative images (**p**) and numbers (**q**) of colonic tumors in WT and miR-146a<sup>-/-</sup> mice treated with anti-IL-17a (500 μg/mouse) twice a week throughout AOM/DSS CRC induction (n = 5). qPCR data as FC from WT. Data representative of ≥2 independent experiments. n = biologically independent replicates per group (**a,b,d,e, g,l,m,q**) or replicates pooled from independent experiments (**i**). Mean ± SEM. \*p<.05, \*\*p<.01, \*\*\*p<.001, by two-way ANOVA with Bonferroni adjustment (**a**), two-way ANOVA with Tukey adjustment (**q**), or two-tailed Student's t-test (**d,e,g,i,l,m**). Source data are provided as a Source data file.
